# Supplementary material for: Characterization and evaluation of curcumin loaded guar gum/polyhydroxyalkanoates blend films for wound healing applications
Source: Royal Society of Chemistry journal article supplement (doi:10.1039/c5ra10114j), 2015-01-01
Supplement: c5ra10114j1.pdf [file c5ra10114j1.pdf]

## Supplementary Information

### **Characterization and evaluation of curcumin loaded guar gum-polyhydroxyalkanoates blend film for wound healing application**

**Nilkamal Pramanik<sup>1</sup>, Tapas Mitra<sup>1</sup>, Moumita Khamrai<sup>1</sup>, Aditi Bhattacharyya<sup>1</sup>, Piyasi Mukhopadhyay<sup>1</sup>, A. Gnanamani<sup>2</sup>, Ranjan Kumar Basu<sup>3</sup>, Patit Paban Kundu<sup>1\*</sup>**

<sup>1</sup>Advanced Polymer Laboratory, Department of Polymer Science & Technology, University of Calcutta, Kolkata- 700009 (India), India,

<sup>2</sup>Central Leather Research Institute, Department of Biological Science (CLRI), Chennai, India,

<sup>3</sup>Department of Chemical Engineering, University of Calcutta, Kolkata- 700009 (India), India

\*Corresponding author, E mail: [ppk923@yahoo.com](mailto:ppk923@yahoo.com);

Phone and fax: 91-33-2352-5106).

**ESI 1: Table 3 FTIR and <sup>1</sup>H NMR Spectra of guar gum, poly(3hydroxybutyrate-co-3hydroxyvalerate) (PHBV), Curcumin and their composite films.**

**ESI 2: Figure 13 Photographs of macroscopic appearance of wound repair covered with (a) control, (b) curcumin composite films at day 0, day 2, day 4 and day 7 respectively.**

## ESI 1

**Table 3. FTIR and <sup>1</sup>H NMR Spectra of guar gum, poly(3hydroxybutyrate-co-3hydroxyvalerate) (PHBV), Curcumin and their composite films.**

| Sample               | FTIR/ATR Spectra                                                                  | <sup>1</sup> H NMR Spectra                                 |
|----------------------|-----------------------------------------------------------------------------------|------------------------------------------------------------|
|                      | Stretching frequency (cm <sup>-1</sup> )                                          | Chemical shift, $\delta$ (ppm)                             |
| <b>Guar gum</b>      | 845, 1033, 1108, 1275, 1386, 1576, 2880, 2934, 3251.17.                           | 5.0, 4.72, 4.5, 3.5, 3.7, 3.8(d), 3.9(d), 4.1(s), 3.95(s). |
| <b>PHBV</b>          | 621,770, 839, 1054, 1102, 1136, 1286, 1381, 1452, 1639.7, 1726, 2854, 2934, 3468. | 0.874, 1.256, 1.599, 2.016, 2.31, 5.339.                   |
| <b>Protein</b>       | 1057, 1095, 1260, 1462.57, 1521.84, 1642, 2823.2, 2891, 3287.37.                  | —                                                          |
| <b>GG/PHBV (7:3)</b> | 3267(-OH group)                                                                   | —                                                          |
| <b>GG/PHBV (5:5)</b> | 32 86 (-OH group)                                                                 | -                                                          |

## ESI 2

|                   |                                                                                   |                                                                                   |                                                                                    |                                                                                     |
|-------------------|-----------------------------------------------------------------------------------|-----------------------------------------------------------------------------------|------------------------------------------------------------------------------------|-------------------------------------------------------------------------------------|
| <b>Treatment</b>  |  |  |  |  |
| <b>Wound area</b> | <b>20mm<sup>2</sup></b>                                                           | <b>16.3 ± 0.18mm<sup>2</sup></b>                                                  | <b>9.9 ± 0.51 mm<sup>2</sup></b>                                                   | <b>2.1 ± 0.081 mm<sup>2</sup></b>                                                   |
| <b>Control</b>    |  |  |  |  |
| <b>Wound area</b> | <b>20mm<sup>2</sup></b><br><b>0 day</b>                                           | <b>18.5 ± 0.12 mm<sup>2</sup></b><br><b>2 days</b>                                | <b>13.4 ± 0.51 mm<sup>2</sup></b><br><b>4 days</b>                                 | <b>8.6 ± 0.5 mm<sup>2</sup></b><br><b>7 days</b>                                    |

**Figure 13: Photographs of macroscopic appearance of wound repair covered with (a) control, (b) curcumin composite films at day 0, day 2, day 4 and day 7 respectively.**
